# Supplementary material for: Effects of Butyrate Supplementation on Inflammation and Kidney Parameters in Type 1 Diabetes: A Randomized, Double-Blind, Placebo-Controlled Trial
Source: MDPI journal article supplement (doi:10.3390/jcm11133573), 2022-06-21
Supplement: s1 [file s1]

**Table S1.** Metabolite panel.

|          | Name                               | Class                         |
|----------|------------------------------------|-------------------------------|
| a(R)-OHB | 1. 2-Hydroxybutyric acid           | Small organic acids           |
| b-OHB    | 2. 3-Hydroxybutyric acid           |                               |
| GBB      | 3. 4-Trimethylammoniobutanoic acid |                               |
| AzeIA    | 4. Azelaic acid                    |                               |
| AADA     | 5. Amino adipic acid               |                               |
| TMAO     | 6. Trimethylamine N-oxide          | Amine oxide, amides, sulfates |
| N-MNA    | 7. N-methylnicotinamide            |                               |
| IndS     | 8. Indoxyl sulfate                 |                               |
| ADMA     | 9. Asymmetric dimethylarginine     | Amino acids                   |
| Gly      | 10. Glycine                        |                               |
| Taurine  | 11. Taurine                        |                               |
| Gln      | 12. L-Glutamine                    |                               |
| Glu      | 13. L-Glutamic acid                |                               |
| Cit      | 14. Citrulline                     |                               |
| HCit     | 15. Homocitrulline                 |                               |

|       |                                 |            |
|-------|---------------------------------|------------|
| Ala   | 16. L-Alanine                   |            |
| Tyr   | 17. L-Tyrosine                  |            |
| Leu   | 18. L-Leucine                   |            |
| Kynu  | 19. L-Kynurenine                |            |
| Ile   | 20. L-Isoleucine                |            |
| Phe   | 21. L-Phenylalanine             |            |
| Trp   | 22. L-Tryptophan                |            |
| Crea  | 23. Creatinine                  |            |
| TCA   | 24. Taurocholic acid            | Bile acids |
| TCDCA | 25. Taurochenodesoxycholic acid |            |
| GCA   | 26. Glycocholic acid            |            |
| GUDCA | 27. Glycoursodeoxycholic acid   |            |
| GCDCA | 28. Glycodeoxycholic acid       |            |
| CDCA  | 29. Chenodeoxycholic acid       |            |
| UDCA  | 30. Ursodeoxycholic acid        |            |
| GDCA  | 31. Glycochenodeoxycholic acid  |            |
| TLCA  | 32. Tauroolithocholic acid      |            |
| CA    | 33. Cholic acid                 |            |

|       |                               |  |
|-------|-------------------------------|--|
| LCA   | 34. Lithocholic acid          |  |
| TDCA  | 35. Taurdeoxycholic acid      |  |
| GLCA  | 36. Glycolithocholic acid     |  |
| DCA   | 37. Deoxycholic acid          |  |
| TUDCA | 38. Tauroursodeoxycholic acid |  |

**Table S2.** Change in serum metabolites after 12 weeks intervention compared by ANCOVA.

|                                         | Before        | After         | Change        | ANCOVA p |
|-----------------------------------------|---------------|---------------|---------------|----------|
| 2-Hydroxybutyric acid (ng/mL)           |               |               |               |          |
| • Sodium Butyrate                       | 22,377 ± 3332 | 21,878 ± 3218 | -499 ± 4359   | 0.37     |
| • Placebo                               | 22,062 ± 3177 | 22,808 ± 4476 | 602 ± 4881    |          |
| 3-Hydroxybutyric acid (ng/mL)           |               |               |               |          |
| • Sodium Butyrate                       | 13,990 ± 1624 | 14,680 ± 2488 | 689 ± 3253    | 0.23     |
| • Placebo                               | 14,688 ± 2620 | 15,459 ± 1746 | 807 ± 2773    |          |
| 4-Trimethylammoniobutanoic acid (ng/mL) |               |               |               |          |
| • Sodium Butyrate                       | 386 [323:461] | 427 [327:516] | 18 [-40:99]   | 0.09     |
| • Placebo                               | 442 [372:588] | 405 [290:523] | -6 [-128:51]  |          |
| Trimethylamine N-oxide (ng/mL)          |               |               |               |          |
| • Sodium Butyrate                       | 248 [209:497] | 257 [217:333] | 13 [-112:144] | 0.06     |
| • Placebo                               | 276 [184:409] | 222 [172:292] | -12 [-151:32] |          |
| Asymmetric dimethylarginine (ng/mL)     |               |               |               |          |
| • Sodium Butyrate                       | 4879 ± 1534   | 4809 ± 1616   | -70 ± 2308    | 0.93     |
| • Placebo                               | 4874 ± 1205   | 4776 ± 1372   | -236 ± 1535   |          |

|                         |                           |                           |                           |      |
|-------------------------|---------------------------|---------------------------|---------------------------|------|
| Glycine (ng/mL)         |                           |                           |                           |      |
| • Sodium Butyrate       | 6521 [4847:8973]          | 8440 [6820:10084]         | 539 [-1938:3803]          | 0.49 |
| • Placebo               | 7705 [5637:10079]         | 6977 [5229:9143]          | -936 [-5080:4144]         |      |
| Taurine (ng/mL)         |                           |                           |                           |      |
| • Sodium Butyrate       | 4861 [3478:6492]          | 5621 [3458:6544]          | 277 [-1885:2653]          | 0.67 |
| • Placebo               | 4919 [3981:6730]          | 5010 [3844:7345]          | -375 [-2792:2910]         |      |
| L-Glutamine (ng/mL)     |                           |                           |                           |      |
| • Sodium Butyrate       | 426,308 [281,386:547,389] | 487,750 [342,208:586,095] | 55,681 [-159,487:257,062] | 0.98 |
| • Placebo               | 394,754 [307,282:621,025] | 490,443 [309,685:759,158] | 23,986 [-117,143:318,692] |      |
| L-Glutamic acid (ng/mL) |                           |                           |                           |      |
| • Sodium Butyrate       | 24,685 ± 12,736           | 27,776 ± 11,393           | 3091 ± 16,641             | 0.81 |
| • Placebo               | 27,828 ± 12,651           | 27,347 ± 14,002           | 196 ± 16,006              |      |
| Citrulline (ng/mL)      |                           |                           |                           |      |
| • Sodium Butyrate       | 3247 [2169:5325]          | 4546 [2487: 6954]         | 853 [-1032:2929]          | 0.59 |
| • Placebo               | 3841 [3107:5701]          | 4705 [2891:5984]          | -104 [-1833:2320]         |      |
| Homocitrulline (ng/mL)  |                           |                           |                           |      |
| • Sodium Butyrate       | 250 [141:365]             | 265 [178:388]             | 43 [-225:163]             | 0.30 |

|                      |                        |                        |                       |      |
|----------------------|------------------------|------------------------|-----------------------|------|
| • Placebo            | 301 [166:453]          | 326 [169:477]          | -4 [-138:237]         |      |
| L-Alanine (ng/mL)    |                        |                        |                       |      |
| • Sodium Butyrate    | 26,725 [16,867:35,115] | 33,564 [22,102:43,648] | 5181 [-3959:23080]    | 0.76 |
| • Placebo            | 29,161 [23,155:38,957] | 27,874 [22,176:48,967] | -372 [-11,099:15,677] |      |
| L-Tyrosine (ng/mL)   |                        |                        |                       |      |
| • Sodium Butyrate    | 4401 [2731:6630]       | 5740 [3149:8306]       | 1031[-1410: 3417]     | 0.37 |
| • Placebo            | 4500 [3456:6902]       | 5161 [3222:8695]       | 100 [-2527:2842]      |      |
| Azelaic acid (ng/mL) |                        |                        |                       |      |
| • Sodium Butyrate    | 275 [251:295]          | 289 [270:308]          | 16 [-12:40]           | 0.49 |
| • Placebo            | 258 [246:282]          | 276 [257:297]          | 22 [-14:50]           |      |
| L-Leucine (ng/mL)    |                        |                        |                       |      |
| • Sodium Butyrate    | 9931 [6840:15609]      | 12,560 [8755:15,851]   | 1669 [-4304:7083]     | 0.58 |
| • Placebo            | 10,416 [9042:12,052]   | 12,513 [7716:19387]    | 2130 [-5378:9095]     |      |
| L-Kynurenine (ng/mL) |                        |                        |                       |      |
| • Sodium Butyrate    | 891 [621:1097]         | 909 [739:1308]         | 121 [-79:375]         | 0.91 |
| • Placebo            | 936 [740:1186]         | 937 [696:1281]         | 44 [-139:353]         |      |
| L-Isoleucine (ng/mL) |                        |                        |                       |      |
| • Sodium Butyrate    | 8203 [5702:10702]      | 12,129 [7079:14,194]   | 2290 [-3127:6525]     | 0.77 |

|                                   |                    |                      |                   |      |
|-----------------------------------|--------------------|----------------------|-------------------|------|
| • Placebo                         | 8452 [7882:12,161] | 10,563 [7265:16,200] | -485 [-4222:6930] |      |
| L-Phenylalanine (ng/mL)           |                    |                      |                   |      |
| • Sodium Butyrate                 | 8617 [6221:12,174] | 10,527 [7750:13,269] | 802 [-2120:5855]  | 0.82 |
| • Placebo                         | 9394 [7809:13,453] | 9919 [7547:14,331]   | 769 [-4270:6418]  |      |
| L-Tryptophan (ng/mL)              |                    |                      |                   |      |
| • Sodium Butyrate                 | 6757 [4355:9560]   | 7718 [5384:11,152]   | 1292 [-2362:4200] | 0.88 |
| • Placebo                         | 7465 [5405:9705]   | 7484 [5577:11,513]   | 690 [-2952:3581]  |      |
| Taurocholic acid (ng/mL)          |                    |                      |                   |      |
| • Sodium Butyrate                 | 261 [179:414]      | 294 [231:464]        | 55 [-13:230]      | 0.64 |
| • Placebo                         | 334 [249:521]      | 384 [172:801]        | 6 [-115:217]      |      |
| Taurochenodesoxycholic acid *     |                    |                      |                   |      |
| • Sodium Butyrate                 | 5.9 [5.2:8.3]      | 8.4 [5.7:12]         | 1.8 [-1.8:5.5]    | 0.48 |
| • Placebo                         | 8.3 [6.7:12]       | 8.0 [3.8:13]         | -0.04 [-5.4:3.7]  |      |
| Glycocholic acid (ng/mL)          |                    |                      |                   |      |
| • Sodium Butyrate                 | 357 [230:552]      | 386 [281:563]        | 14 [-94:156]      | 0.55 |
| • Placebo                         | 375 [241:529]      | 376 [196:649]        | -6.8 [-267:225]   |      |
| Glycoursodeoxycholic acid (ng/mL) |                    |                      |                   |      |
| • Sodium Butyrate                 | 22 [21:26]         | 26 [22:29]           | 1.7 [-2.5:6.5]    | 0.14 |

|                                    |                        |                        |                       |      |
|------------------------------------|------------------------|------------------------|-----------------------|------|
| • Placebo                          | 24 [22:29]             | 25 [21:30]             | -0.60 [-4.8:2.2]      |      |
| Glycodeoxycholic acid (ng/mL)      |                        |                        |                       |      |
| • Sodium Butyrate                  | 395 [369:412]          | 397 [347:423]          | 5.1 [-49:37]          | 0.42 |
| • Placebo                          | 401 [372:465]          | 400 [369:454]          | -4.5 [-118:44]        |      |
| Chenodeoxycholic acid *            |                        |                        |                       |      |
| • Sodium Butyrate                  | 196 [184:220]          | 211 [193:235]          | 17 [-15:50]           | 0.42 |
| • Placebo                          | 207 [181:237]          | 205 [178:225]          | 9.5 [-31:38]          |      |
| Ursodeoxycholic acid (ng/mL)       |                        |                        |                       |      |
| • Sodium Butyrate                  | 153 [146:158]          | 155 [149:169]          | 2.8 [-2.9:20]         | 0.71 |
| • Placebo                          | 156 [148:170]          | 163 [149:170]          | 7.9 [-30:21]          |      |
| Glycochenodeoxycholic acid (ng/mL) |                        |                        |                       |      |
| • Sodium Butyrate                  | 48 [35:70]             | 48 [34:76]             | -0.41 [-13:14]        | 0.27 |
| • Placebo                          | 50 [42:84]             | 45 [32:61]             | -19 [-44:4.3]         |      |
| Tauroolithocholic acid *           |                        |                        |                       |      |
| • Sodium Butyrate                  | 22,762 [16,804:28,307] | 24,118 [17,165:27,228] | -744 [-11,656:10,422] | 0.34 |
| • Placebo                          | 25,126 [19,653:33,056] | 20,995 [16,199:25,347] | -4171 [-9376:-418]    |      |
| Cholic acid (ng/mL)                |                        |                        |                       |      |
| • Sodium Butyrate                  | 195 [138 :512]         | 200 [143:318]          | -8 [-299:98]          | 0.22 |



|                          |               |              |               |      |
|--------------------------|---------------|--------------|---------------|------|
| • Placebo                | 202 [148:397] | 174 [31:321] | -12 [-176:30] |      |
| Lithocholic acid (ng/mL) |               |              |               |      |
| • Sodium Butyrate        | 106 ± 28      | 96 ± 24      | -10 ± 30      | 0.71 |
| • Placebo                | 97 ± 22       | 98 ± 36      | 0.42 ± 43     |      |

Values are mean ± standard deviation or median [Q1:Q3]. Parameters with a non-normal distribution were log transformed before analysis. P value for the group-wise comparison of participants treated with sodium butyrate or placebo was calculated using baseline-corrected linear regression.

\*Calculated concentrations were below limit of quantification and values are represented by the peak area of the compound in the chromatogram obtained in the samples via UHPLC-MS analysis.

**Table S3.** Gastrointestinal symptoms before and after 12 weeks intervention.

|                | Baseline    |                 |         | Improvement of existing symptom |            | Worsening or onset of symptom |            |
|----------------|-------------|-----------------|---------|---------------------------------|------------|-------------------------------|------------|
|                | ALL         | Sodium butyrate | Placebo | Sodium butyrate                 | Placebo    | Sodium butyrate               | Placebo    |
| Diarrhea       | 16/51 (31%) | 7 /28           | 9/23    | 2/7 (29%)                       | 6/9 (67%)  | 1/28 (4%)                     | 2/23 (9%)  |
| Constipation   | 14/51 (27%) | 6/28            | 8/23    | 5/6 (83%)                       | 4/8 (50%)  | 3/28 (11%)                    | 2/23 (9%)  |
| Abdominal pain | 13/51 (25%) | 8/28            | 5/23    | 5/8 (63%)                       | 2/5 (40%)  | 2/28 (7%)                     | 5/23 (22%) |
| Heartburn      | 10/51 (20%) | 6/28            | 4/23    | 1/6 (17%)                       | 1/4 (25%)  | 3/28 (11%)                    | 6/23 (26%) |
| Nausea         | 10/51 (20%) | 5 /28           | 5/23    | 4/5 (80%)                       | 5/5 (100%) | 2/28 (7%)                     | 2/23 (9%)  |
| Poor appetite  | 9/47 (19%)  | 5 /25           | 4/22    | 2/5 (40%)                       | 4/4 (100%) | 2/25 (8%)                     | 2/22 (9%)  |
| Vomiting       | 1/51 (2%)   | 1/28            | 0/23    | 0/1 (0%)                        | 0/0 (-)    | 0/1 (0%)                      | 0 (-)      |

Proportions of participants who reported gastrointestinal symptoms within two weeks before baseline and how the symptoms were reported within two weeks before EOS. The numbers do not discriminate between the frequency and severity of the symptom.
